# Supplementary material
Source: Springer Nature journal article supplement (https://www.springermedizin.de/resource/supplementary/13075_2009_2752_MOESM7_ESM.pdf/9692802)

(a)

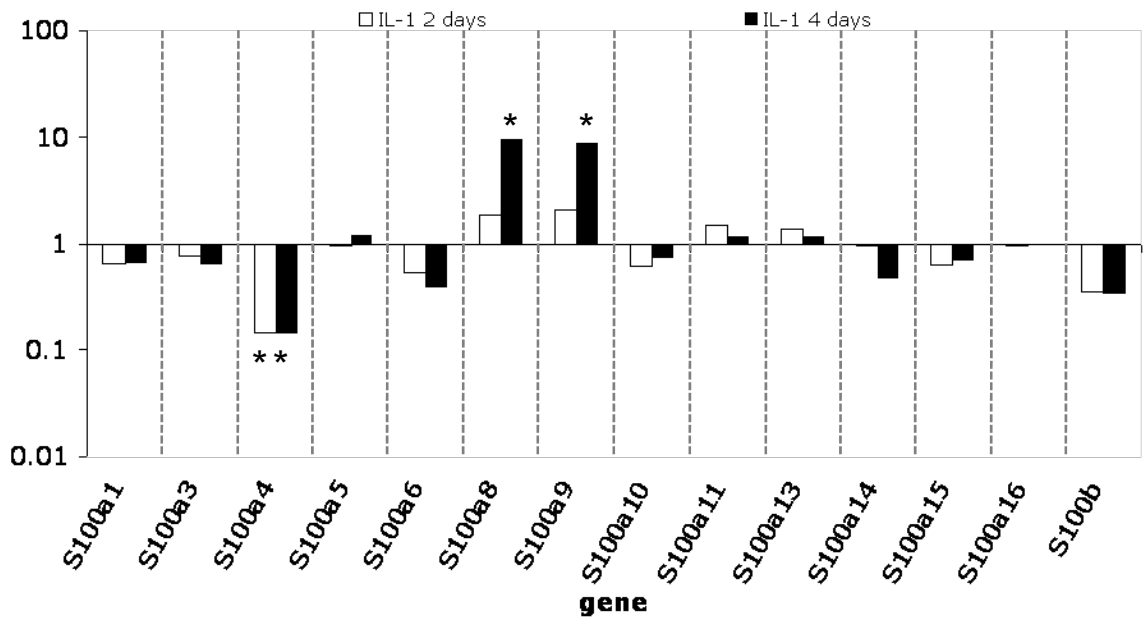

(b)

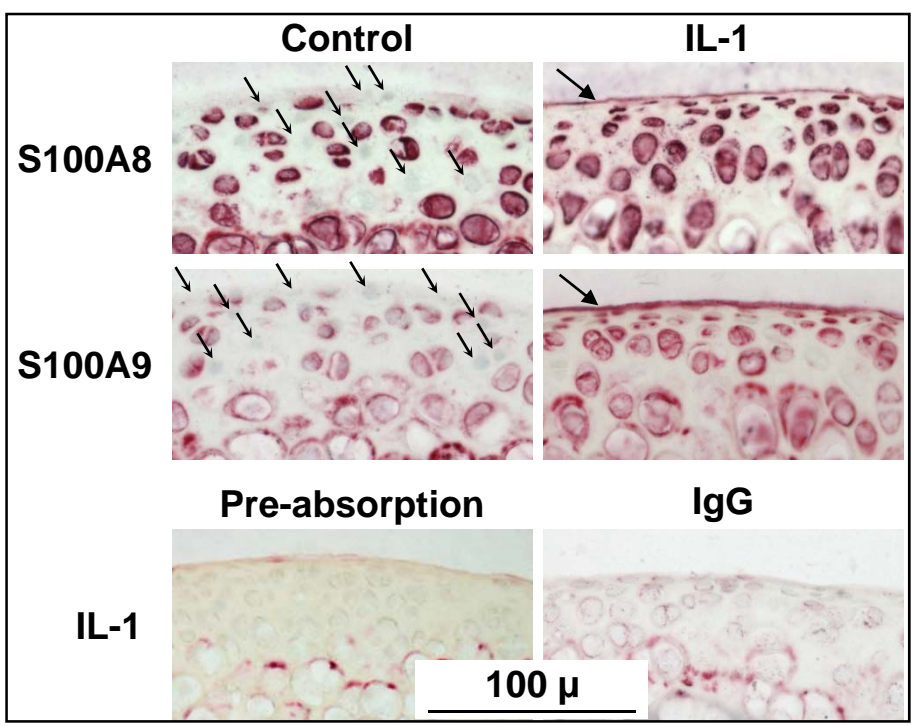

Supplement: MOESM7 [file 9692802]
